# Supplementary material
Source: publisher site journal article supplement (https://www.dovepress.com/article/427783)
Supplement: Supplementary file 1 [file get_supplementary_file.php]

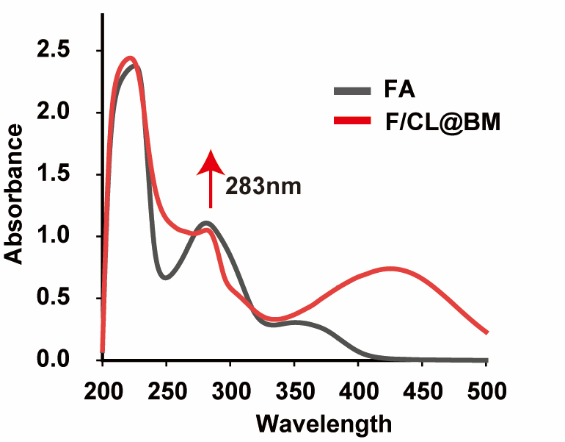


**Supplementary Figure1.** Ultraviolet absorption spectra of F/CL@BM or folic acid (FA) in PBS.


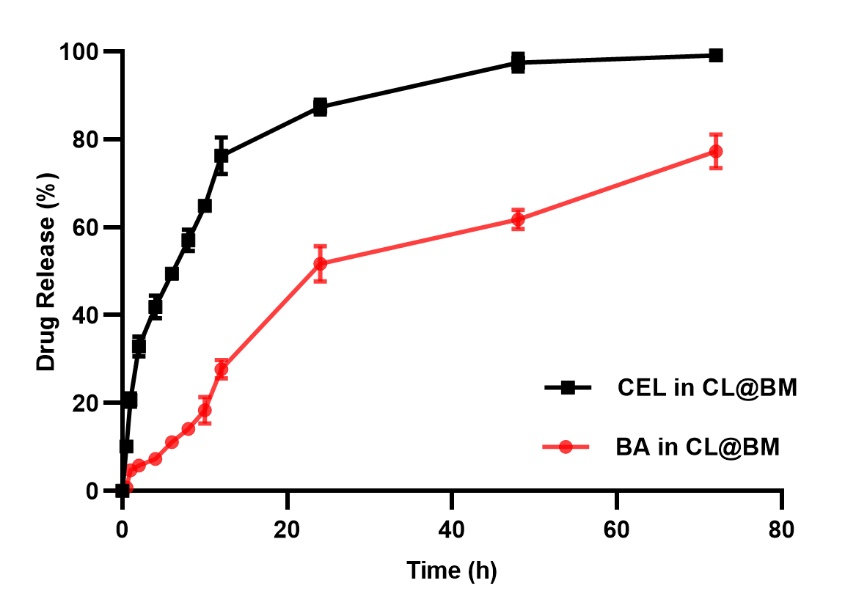


**Supplementary Figure2** Release of betulinic acid (BA) from BMs or CL@BM (left plot), and comparison of the release of celastrol (CEL) or BA from CL@BM (right plot). Experiments were conducted in PBS (pH6.5). Data are mean ± SD (n = 3).


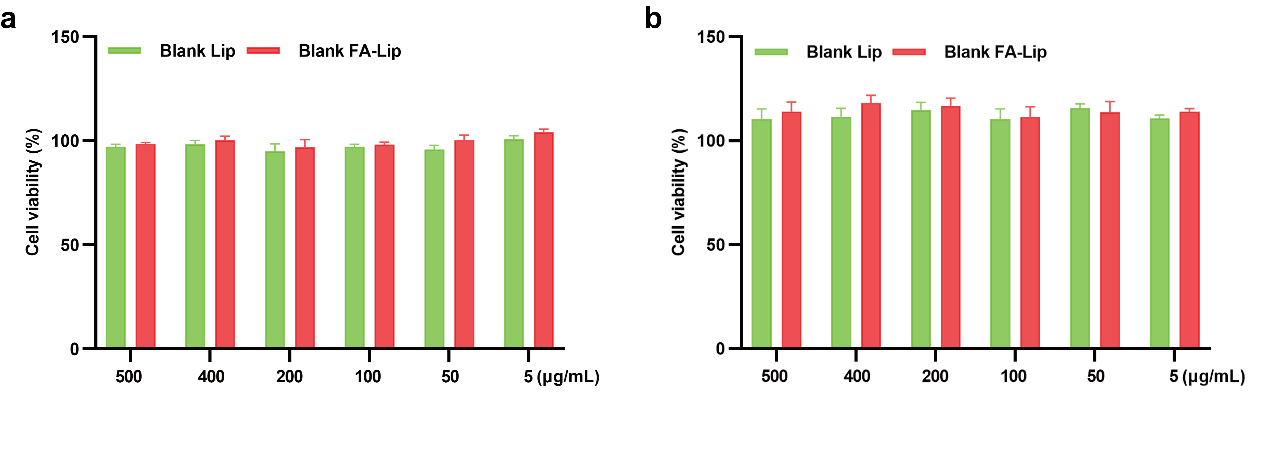


**Supplementary Figure3** Cell viability of (a) 4T1 cells or (b) co-cultured cells (ratio of 4T1 to NIH 3T3 cells was 1:1) after incubation with blank liposome (Blank Lip) and blank FA- liposome (Blank FA-Lip) at different concentrations for 48 h.


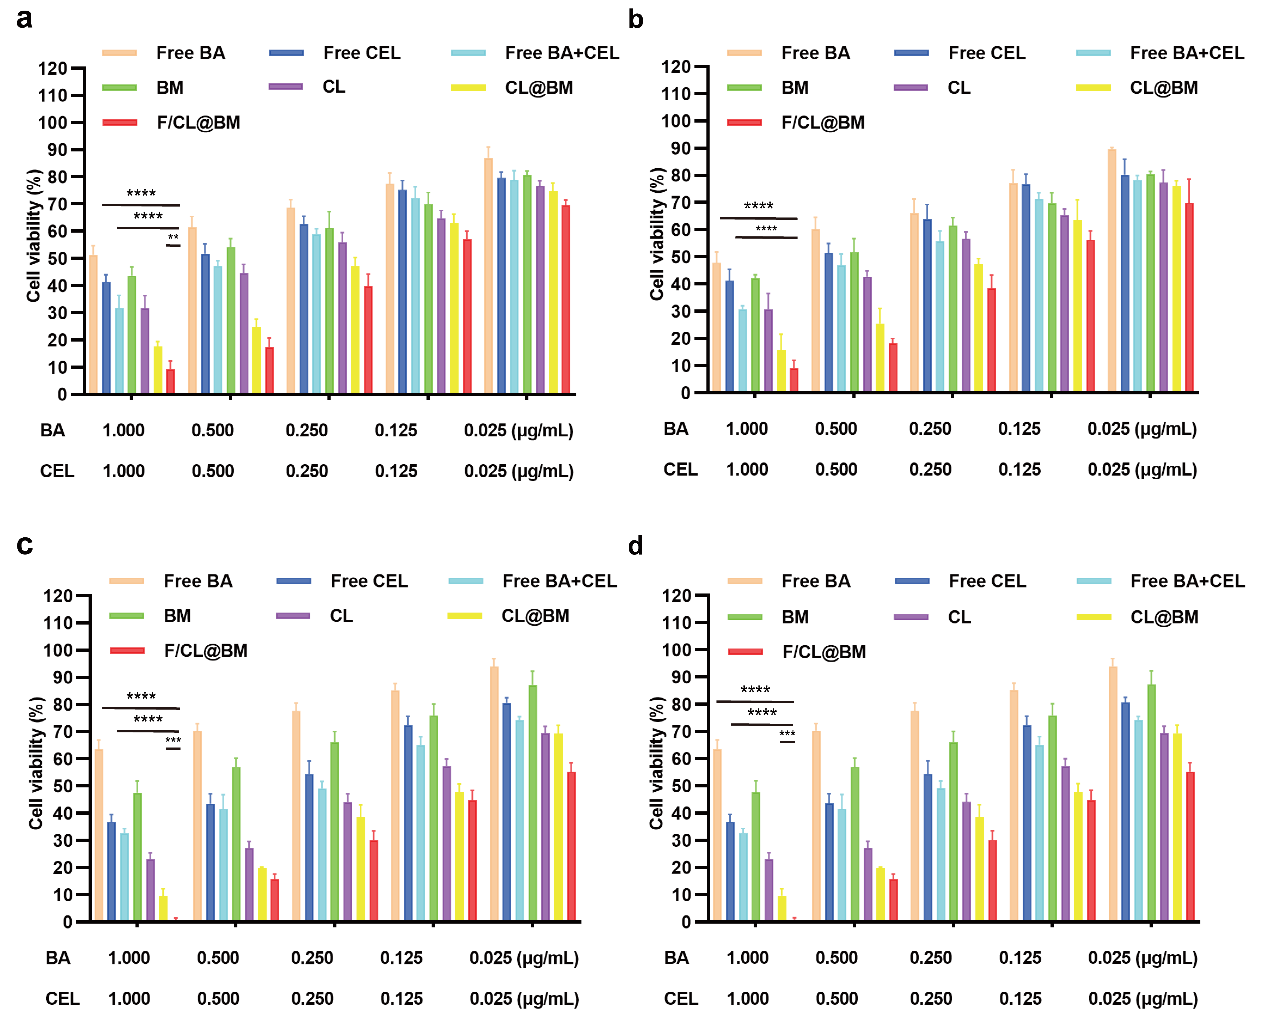


**Supplementary Figure4 Cytotoxicity of different drug formulations against 4T1 tumor cells. The formulations described in Figure 1 were used, as well as free betulinic acid (BA) and free celastrol (CEL). Cytotoxicity was assessed using the Cell Counting Kit-8 assay with 4T1 tumor cells cultured (a-b) alone or (c-d) together with NIH 3T3 fibroblasts. Data are mean ± SD (n = 3). ****p < 0.0001, ***p < 0.001, **p < 0.01.**


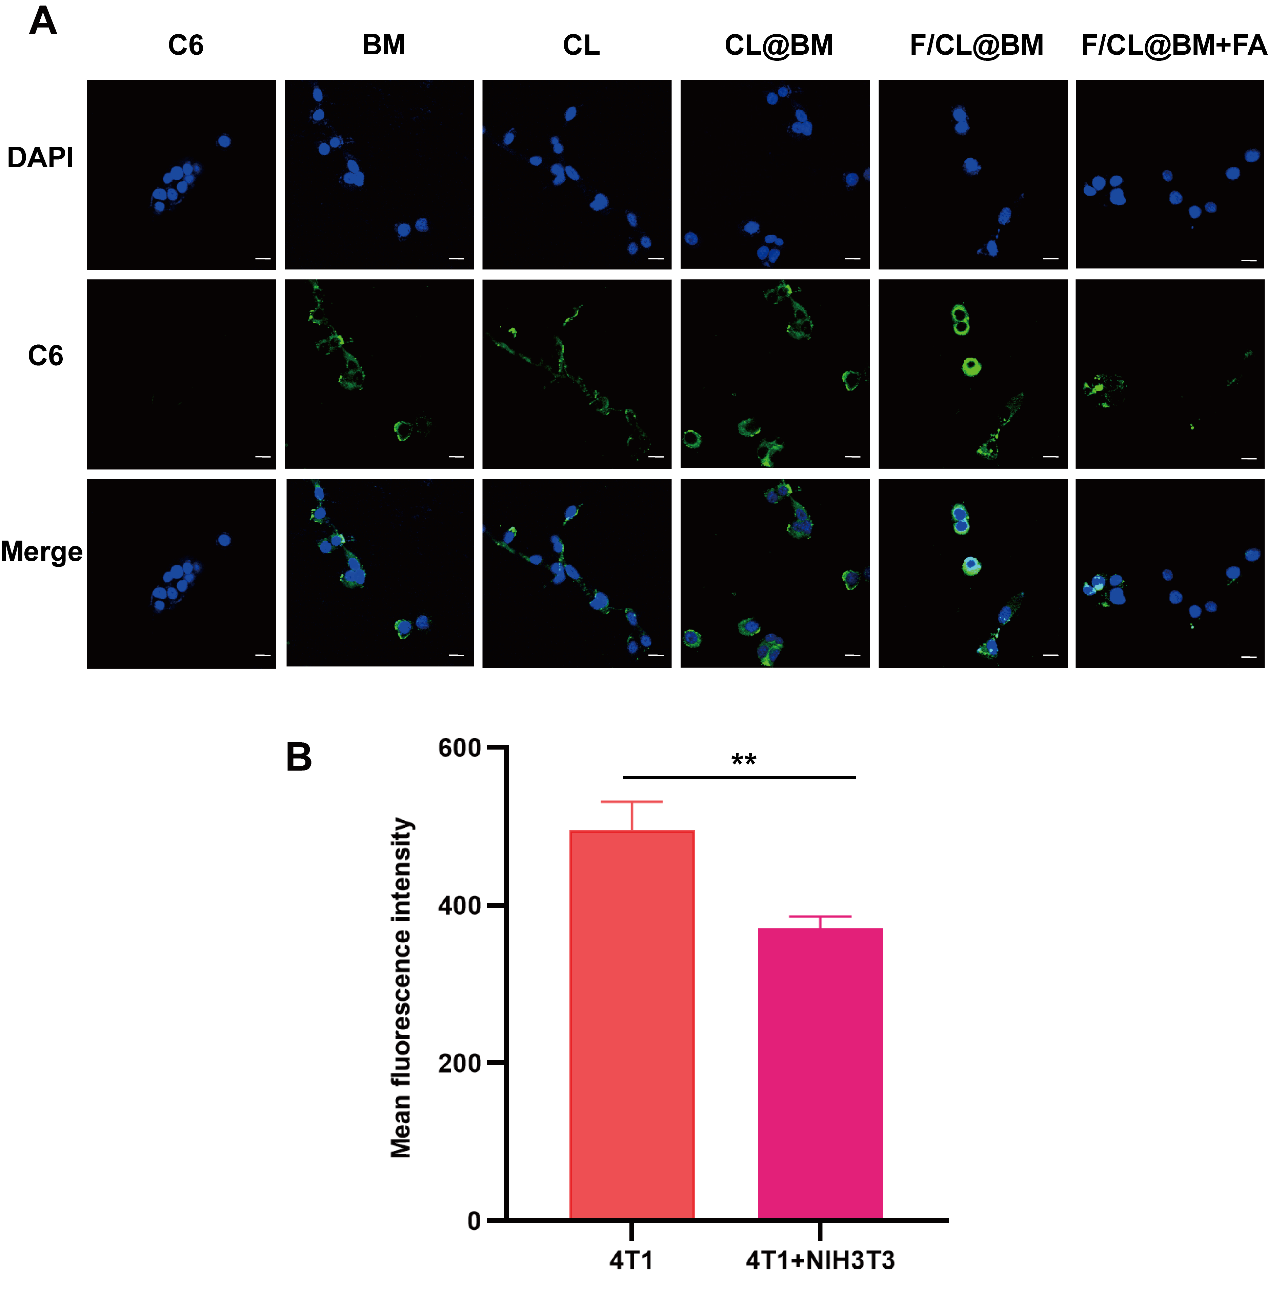


**Supplementary Figure5** **(A) Confocal micrographs showing uptake of drug formulations by co-** **cultured cells. Scale bar, 50 μm**. **(B) Quantitation of uptake using flow cytometry. Data are mean ± SD (n = 3). **p < 0.01.**


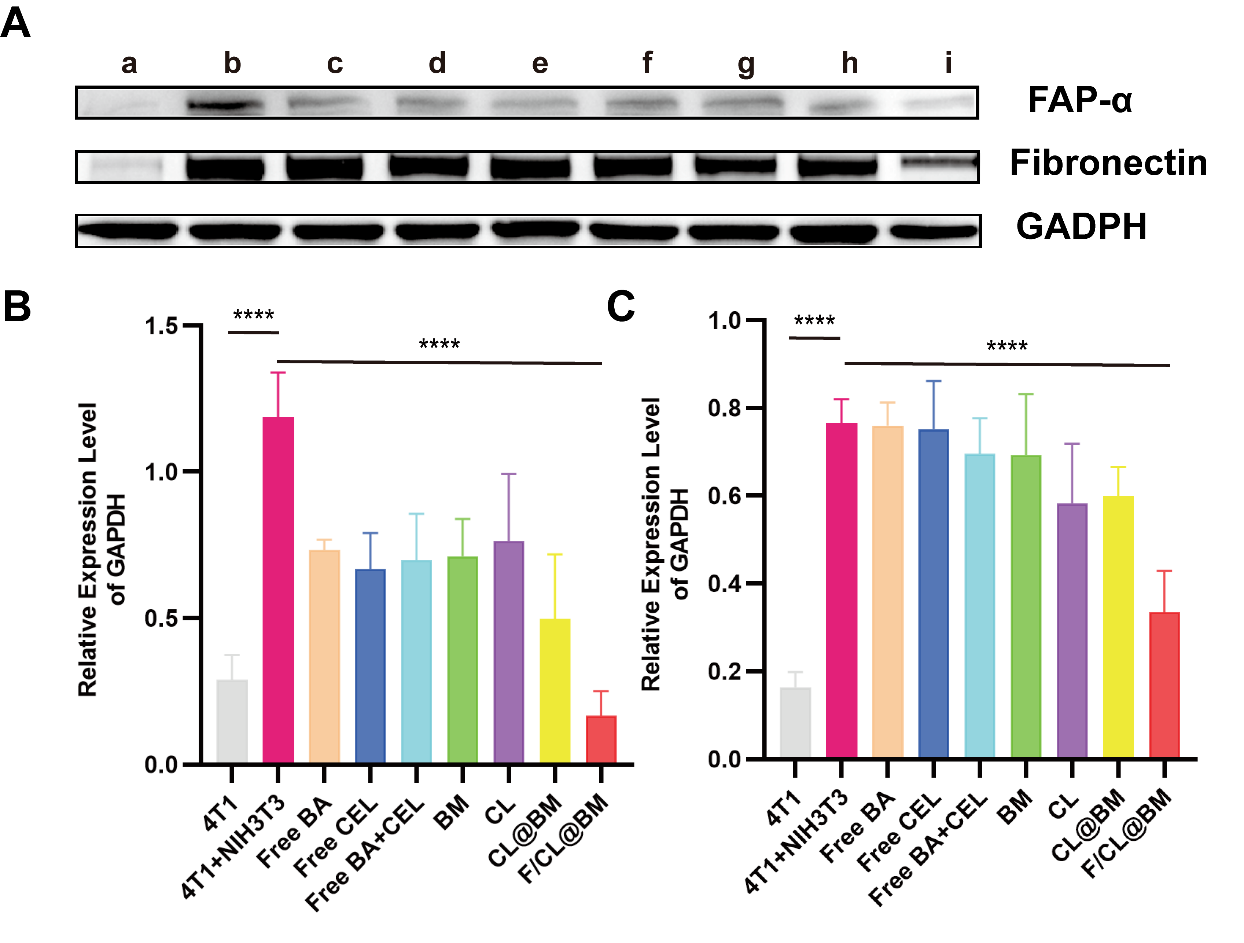


**Supplementary Figure6 Western blotting against FAP and Fibroncetin in total soluble protein fractions from (a) control 4T1 cells in monoculture, (b) control co-cultures of 4T1 cells and NIH 3T3 fibroblasts, or co-cultures treated with (c) free BA, (d) free CEL (e) free CEL+BA, (f) BM, (g) CL, (h) CL@BM or (i) F/CL@BM. (A) Western blotting assay for the expression of protein. (B) Quantitative analysis. Data are shown as mean±SD (n=3). ****p < 0.0001.**


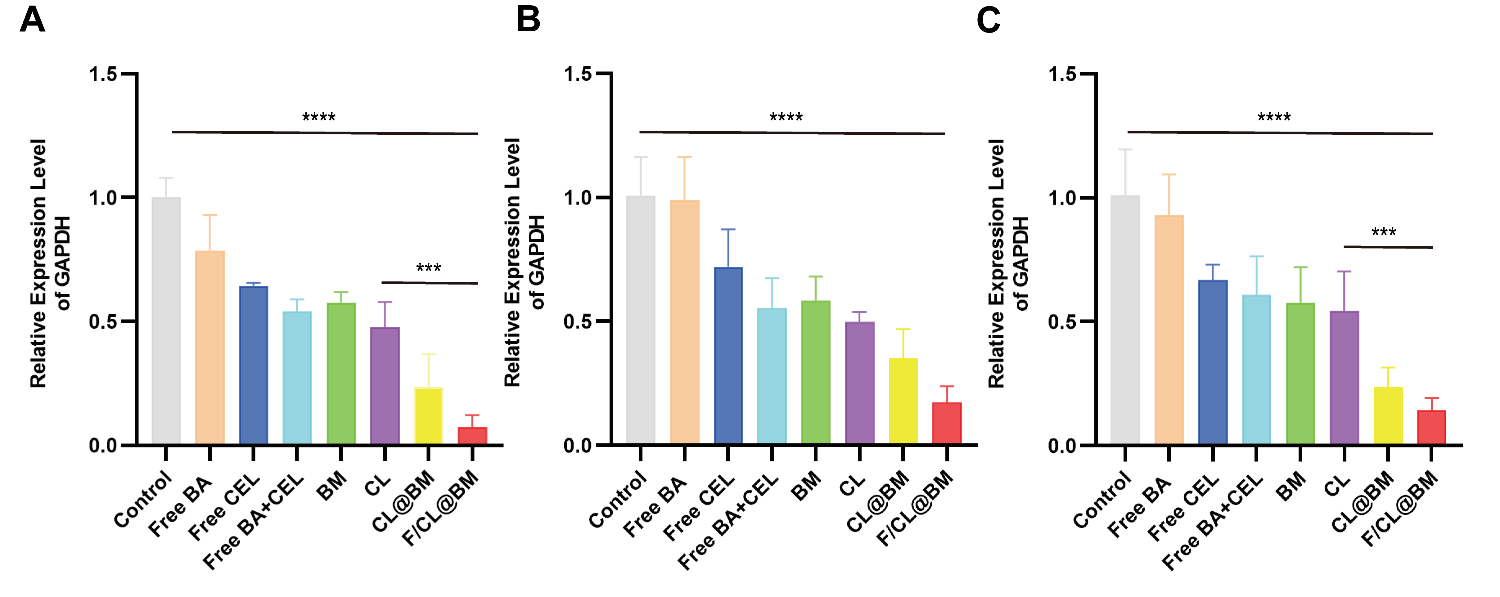


**Supplementary Figure7 The expression of FAP (A), Fibroncetin (B) was determined by Quantitative Real-time PCR of co-cultures of 4T1 cells and NIH 3T3 fibroblasts after treatment with diferent preparations. Data are shown as mean±SD (n=3). ***p<0.001, ****p<0.0001.**


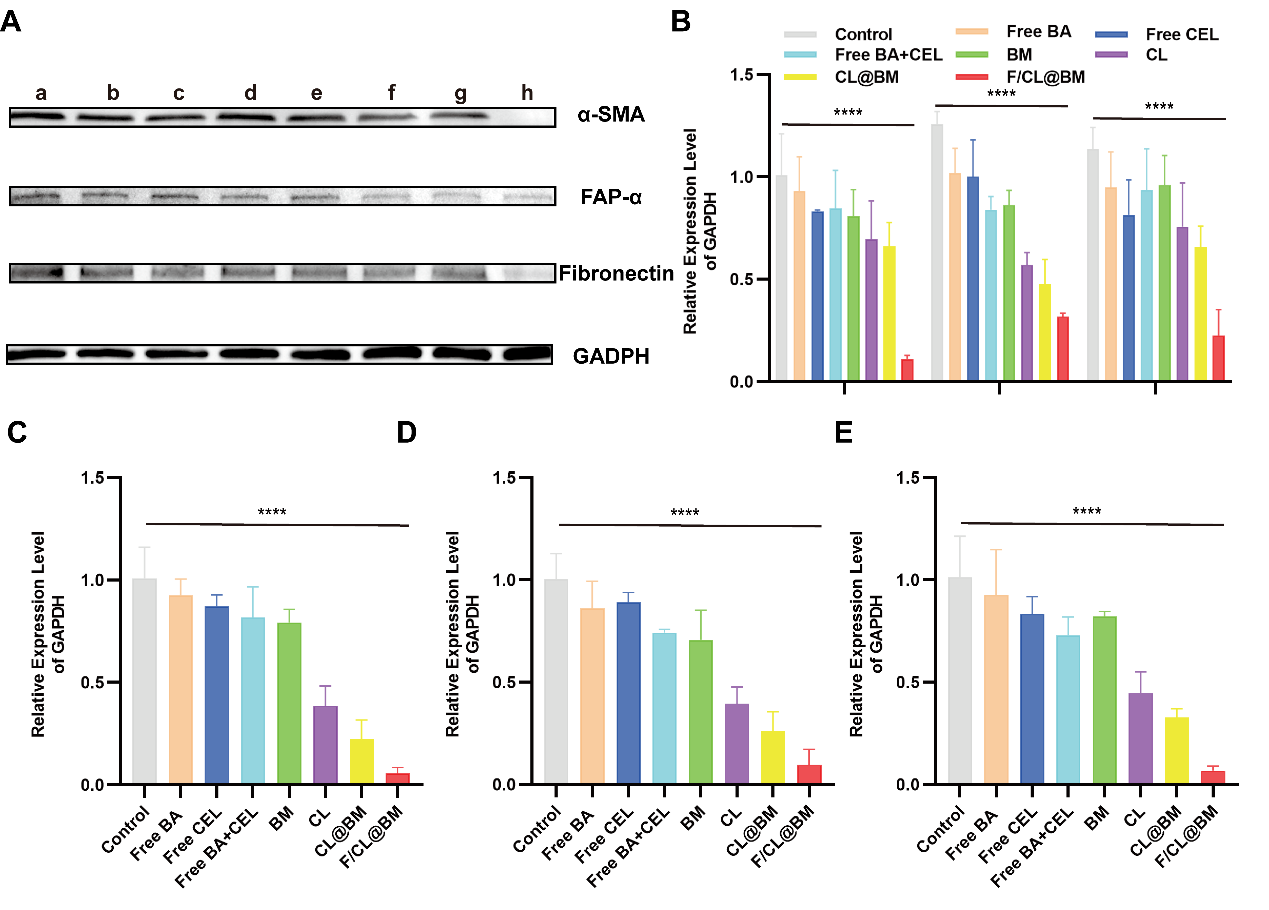


**Supplementary Figure8 Western blotting and Quantitative Real-time PCR against α-SMA, FAP and Fibroncetin in vivo from (a) “Control” animals (injected with PBS), (b) free BA, (c) free CEL (d) free CEL+BA, (e) BM, (f) CL, (g) CL@BM or (h) F/CL@BM. (A) Western blotting assay for the expression of protein. (B) Quantitative analysis. (C-E) The expression of α-SMA (C), FAP (D), Fibroncetin (E) was determined by Quantitative Real-time PCR. Data are shown as mean±SD (n=3). ****p < 0.0001.**


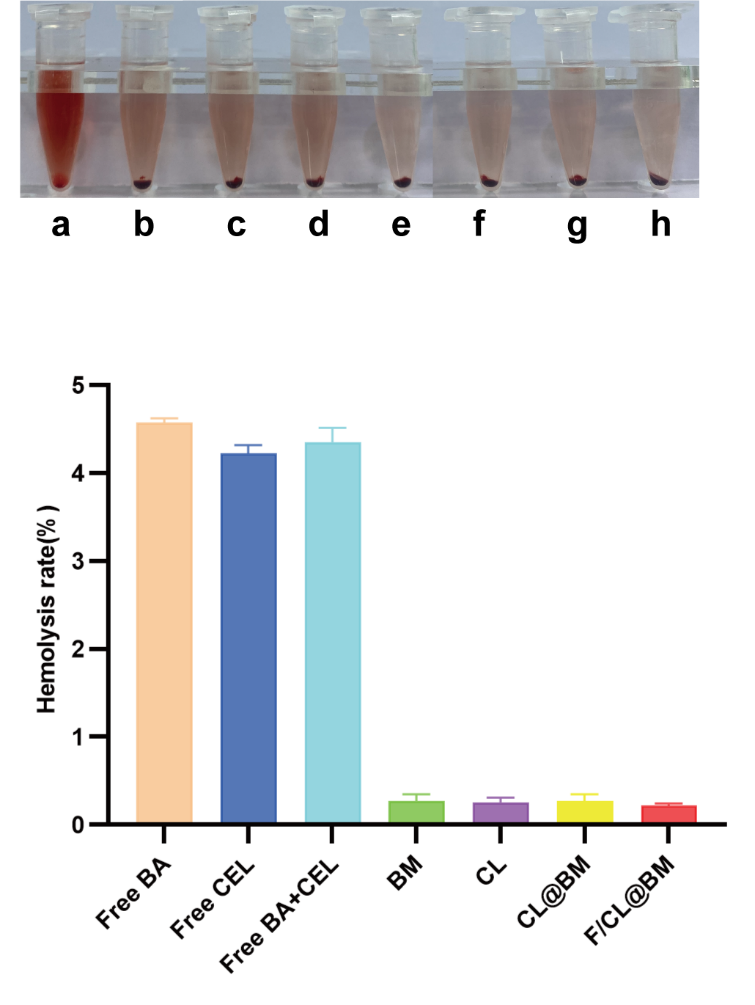


**Supplementary Figure9** Hemolysis assay. a, Water; b, Free BA; c, Free CEL; d, Free BA+CEL; e, BM; f, CL; g, CL@BM; h, F/CL@BM.
